# Supplementary material for: Magnesium Fertilization Improves Crop Yield in Most Production Systems: A Meta-Analysis
Source: PubMed Central journal article supplement (PMC6992656; doi:10.3389/fpls.2019.01727), 2020-01-24
Supplement: Image_1.pdf [file Image_1.pdf]

## Supplementary Figure S1

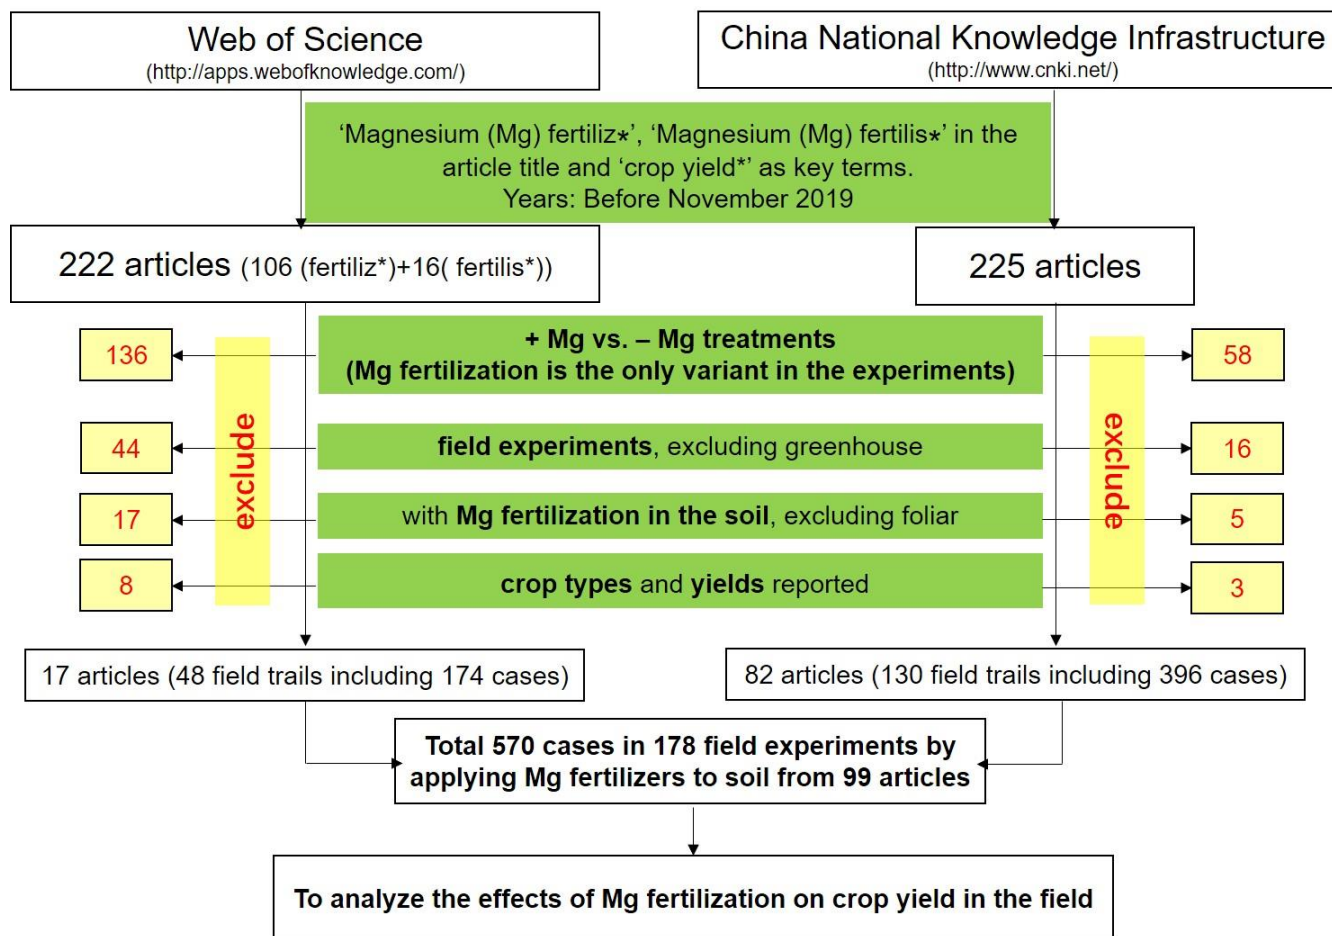

**Figure S1** | Screening method of Mg dataset by preferred reporting items for systematic reviews and Meta-analysis (PRISMA).
