# Supplementary material for: Magnesium Fertilization Improves Crop Yield in Most Production Systems: A Meta-Analysis
Source: PubMed Central journal article supplement (PMC6992656; doi:10.3389/fpls.2019.01727), 2020-01-24
Supplement: Image_2.pdf [file Image_2.pdf]

## Supplementary Material

**Supplementary Figure S2**

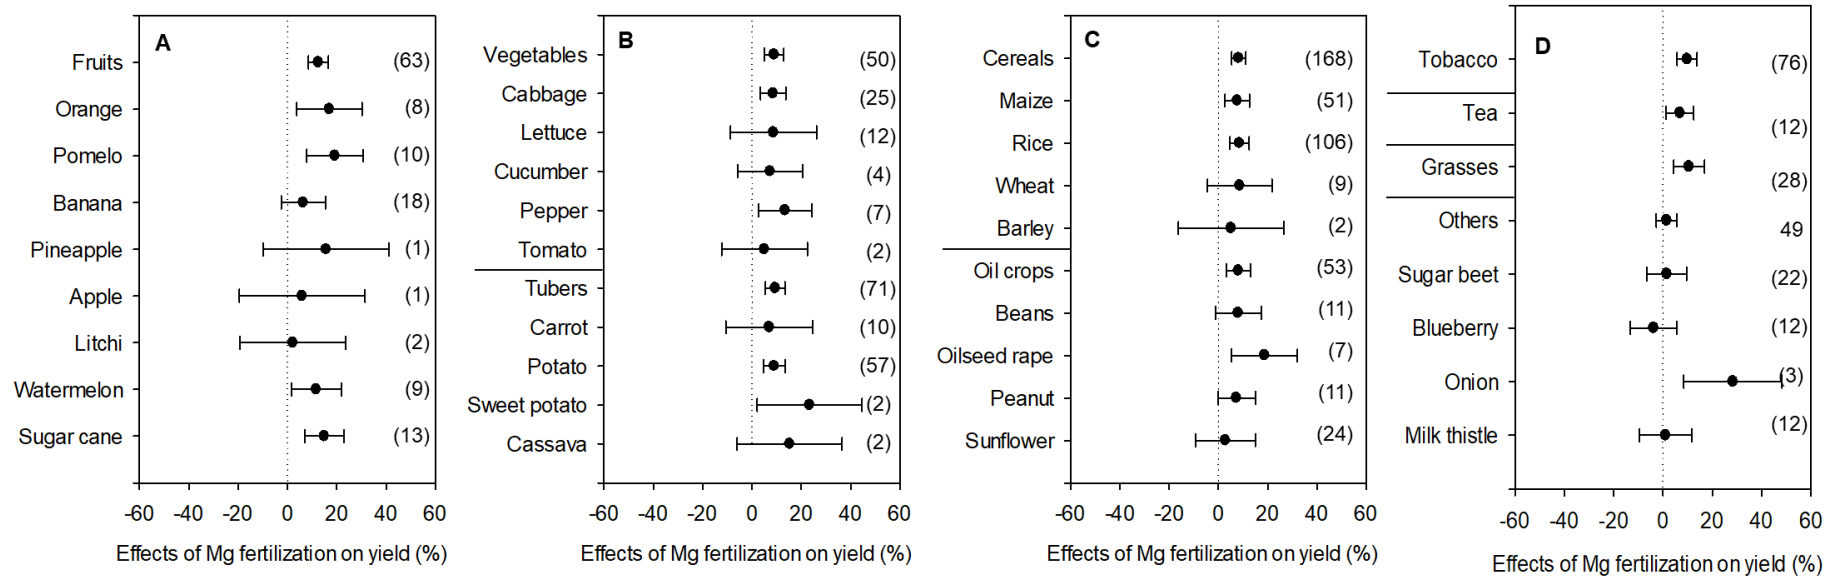

**Figure S2** | Effects of Mg fertilization on yield (crop groups based on figure 2) of fruits **(A)**, vegetables and tubers **(B)**, cereals and oil crops **(C)** tobacco, tea, grasses and other crops **(D)**. The data points were means  $\pm$  95% CI (confidence interval), and the number of experimental observations were indicated in parentheses.
