# Supplementary material for: Magnesium Fertilization Improves Crop Yield in Most Production Systems: A Meta-Analysis
Source: PubMed Central journal article supplement (PMC6992656; doi:10.3389/fpls.2019.01727), 2020-01-24
Supplement: Table_1.pdf [file Table_1.pdf]

## *Supplementary Material*

### **Supplementary Table S1**

**Table S1** Analysis of interaction effects between soil exchangeable Mg and MgO rates for yield improvement

| Source of Variation                           | SS       | df  | MS     | F     | P       |
|-----------------------------------------------|----------|-----|--------|-------|---------|
| S <sub>1</sub> (Soil ex-Mg)                   | 1650.60  | 2   | 825.30 | 6.246 | 0.002** |
| S <sub>2</sub> (MgO rates)                    | 2.25     | 2   | 1.12   | 0.009 | 0.992   |
| Interaction (S <sub>1</sub> *S <sub>2</sub> ) | 574.67   | 4   | 143.67 | 1.087 | 0.362   |
| Error                                         | 58142.76 | 440 | 132.14 |       |         |
| Total                                         | 89390.16 | 449 |        |       |         |

Soil ex-Mg, soil exchangeable magnesium concentration; MgO rate, the amount of MgO in applied magnesium fertilizer. \*\*, significance at  $P < 0.01$
