# Supplementary material for: Magnesium Fertilization Improves Crop Yield in Most Production Systems: A Meta-Analysis
Source: PubMed Central journal article supplement (PMC6992656; doi:10.3389/fpls.2019.01727), 2020-01-24
Supplement: Table_2.pdf [file Table_2.pdf]

## Supplementary Table S2

**Table S2** Analysis of interaction effects between soil pH and soil ex-Mg for yield improvement

| Source of Variation                           | SS       | df  | MS     | F     | <i>P</i> |
|-----------------------------------------------|----------|-----|--------|-------|----------|
| S <sub>2</sub> (Soil ex-Mg)                   | 844.89   | 2   | 422.45 | 2.915 | 0.050*   |
| S <sub>1</sub> (Soil pH)                      | 444.85   | 2   | 222.43 | 1.535 | 0.217    |
| Interaction (S <sub>1</sub> *S <sub>2</sub> ) | 144.13   | 3   | 48.04  | 0.332 | 0.803    |
| Error                                         | 54489.91 | 376 | 144.92 |       |          |
| Total                                         | 83838.56 | 384 |        |       |          |

Soil ex-Mg: soil exchangeable Mg concentration. \*, significance at  $P < 0.05$
