# Supplementary material for: Magnesium Fertilization Improves Crop Yield in Most Production Systems: A Meta-Analysis
Source: PubMed Central journal article supplement (PMC6992656; doi:10.3389/fpls.2019.01727), 2020-01-24
Supplement: Table_3.pdf [file Table_3.pdf]

### Supplementary Table S3

**Table S3** Analysis of interaction effects between soil pH and Mg fertilizer types for yield improvement

| Source of Variation                           | SS        | df  | MS      | F      | <i>P</i> |
|-----------------------------------------------|-----------|-----|---------|--------|----------|
| S <sub>1</sub> (Soil pH)                      | 5783.01   | 2   | 2891.51 | 13.163 | 0.000**  |
| S <sub>2</sub> (Mg types)                     | 47.07     | 1   | 47.07   | 0.214  | 0.644    |
| Interaction (S <sub>1</sub> *S <sub>2</sub> ) | 1777.16   | 2   | 888.58  | 4.045  | 0.018*   |
| Error                                         | 90720.07  | 413 | 219.66  |        |          |
| Total                                         | 134663.44 | 419 |         |        |          |

\* and \*\*, significance at  $P < 0.05$  and  $P < 0.01$ , respectively.
